# Supplementary material for: Ethnic Disparities in Gastric Cancer Presentation and Screening Practice in the United States: Analysis of 1997–2010 Surveillance, Epidemiology, and End Results-Medicare Data
Source: Oxford University Press journal article supplement (doi:10.1158/1055-9965.epi-18-0471), 2019-03-26
Supplement: 10559965epi180471-sup-200992_3_supp_5188673_p5w151.docx [file 10559965epi180471-sup-200992_3_supp_5188673_p5w151.docx]

**Supplementary Table 3**. Median Number of Months between Date of Medical Services Claims for Specific Gastrointestinal Disorders and Screening History and Date of Gastric Cancer Diagnosis – 1997-2010

| **Characteristic** | **Total** | **NHW** | **API** | **Hispanic** | **Black** |  |
| --- | --- | --- | --- | --- | --- | --- |
|  | **Median Months (IQR)** | | | | | **p-value** |
| Peptic Ulcer | -3.81 (29.11) | -3.81 (28.22) | -6.52 (39.4) | -1.81 (26.6) | -3.19 (23.5) | <0.001 |
| Gastric Ulcer | 0.10 (6.80) | 0.13 (6.73) | 0.13 (7.59) | 0.16 (6.47) | 0.00 (7.72) | 0.006 |
| Duodenal Ulcer | -1.94 (19.61) | -2.27 (18.07) | -2.63 (36.44) | -0.38 (18.24) | -1.63 (20.40) | 0.126 |
| Gastrojejunal Ulcer | 1.35 (21.12) | 0.79 (18.10) | 4.34 (28.35) | 8.67 (31.83) | 0.97 (18.94) | 0.002 |
| Gastritis | -0.33 (18.30) | 0.00 (14.65) | -1.87 (31.27) | -1.02 (22.70) | -0.69 (18.82) | <0.001 |
| Disorders Function | 0.36 (16.92) | 0.43 (15.01) | 0.03 (27.50) | 0.56 (0.49) | 0.49 (18.17) | <0.001 |
| Disorders Others | 0.49 (9.83) | 0.53 (9.95) | 0.56 (11.86) | 0.49 (0.33) | 0.33 (8.54) | 0.003 |
| Mucositis | 4.11 (25.00) | 2.30 (22.01) | 1.84 (0.00) | 3.99 (36.27) | 36.27 (62.75) | 0.581 |
| Established Conditionsb | -1.87 (18.79) | -1.02 (14.78) | -4.76 (33.24) | -2.35 (23.41) | -2.86 (17.31) | <0.001 |
| *H. pylori* Testingc | -4.90 (33.00) | -4.24 (32.26) | -7.10 (38.86) | -3.88 (32.13) | -3.15 (30.65) | 0.041 |
| Endoscopyc | 0.33 (2.10) | 0.33 (2.04) | 0.33 (2.93) | 0.36 (2.07) | 0.36 (1.74) | 0.004 |
| *H. pylori* Testing | -4.19 (32.3) | -3.58 (32.00) | -6.87 (36.18) | -3.63 (31.05) | -3.25 (33.05) | 0.019 |
| Endoscopy | 0.39 (0.88) | 0.39 (0.88) | 0.39 (1.41) | 0.43 (0.89) | 0.43 (0.89) | 0.001 |

aKruskal-Wallis test

bEstablished conditions: combined count of those with peptic ulcer or gastric ulcer or duodenal ulcer or a history of gastritis which are indicator conditions for *H. pylori* testing

cFrequencies are of total number with an established condition Abbreviations: NHW: Non-Hispanic White; API: Asian/Pacific Islander
